# Supplementary material for: Attitudes towards Digital Educational Technologies Scale for University Students: Development and Validation
Source: MDPI journal article supplement (doi:10.3390/computers12090176), 2023-09-05
Supplement: s1 [file s1]

## Первоначальный вариант шкалы отношения студентов к ЦОТ

### Уважаемый студент!

Ответьте, пожалуйста, на приведенные ниже вопросы относительно использования цифровых технологий в высшем образовании. Цифровые технологии в данном опросе понимаются предельно широко: как цифровые (электронные) учебные материалы (электронные учебники, презентации, задания и др.), цифровые образовательные ресурсы (электронные базы данных, библиотеки, поисковые ресурсы и т.п.), цифровые образовательные системы (LMS, ТУИС и т.п.), цифровые платформы, используемые для обучения (ZOOM, MS Teams, и др.), и цифровая (виртуальная) образовательная среда. Постарайтесь быть искренними.

| №                                                                                                                          | Утверждение                                                                                                                                     | 1 | 2 | 3 | 4 | 5 |
|----------------------------------------------------------------------------------------------------------------------------|-------------------------------------------------------------------------------------------------------------------------------------------------|---|---|---|---|---|
| <i>Пожалуйста, оцените свои эмоции и чувства по отношению к цифровым технологиям в высшем образовании.</i>                 |                                                                                                                                                 |   |   |   |   |   |
| 1                                                                                                                          | Мне нравится, что существуют современные цифровые устройства и технологии, которые можно использовать в учебном процессе.                       |   |   |   |   |   |
| 2                                                                                                                          | Я негативно отношусь к возможности использования цифровых устройств и технологий на семинарских занятиях даже в учебных целях.                  |   |   |   |   |   |
| 3                                                                                                                          | Я доволен, что цифровые устройства и технологии можно использовать при прохождении аттестаций и сдаче экзаменов.                                |   |   |   |   |   |
| 4                                                                                                                          | Мне нравятся возможности современных электронно-библиотечных систем (ЭБС) и баз данных для поиска учебной и научной литературы.                 |   |   |   |   |   |
| 5                                                                                                                          | Я позитивно отношусь к возможностям, которые предоставляют социальные сети и мессенджеры для обсуждения различных вопросов, связанных с учебой. |   |   |   |   |   |
| 6                                                                                                                          | Мне нравится, что у всех современных вузов есть официальные сайты.                                                                              |   |   |   |   |   |
| 7                                                                                                                          | Я рад, что в социальных сетях можно узнавать новости студенческой жизни.                                                                        |   |   |   |   |   |
| 8                                                                                                                          | Я доволен, что теперь можно получить учебники и другую литературу в цифровом виде в электронной библиотеке моего вуза.                          |   |   |   |   |   |
| 9                                                                                                                          | Я негативно отношусь к использованию мультимедийных презентаций в учебном процессе.                                                             |   |   |   |   |   |
| 10                                                                                                                         | Мне нравится, что теперь существует электронная форма сдачи домашних заданий.                                                                   |   |   |   |   |   |
| 11                                                                                                                         | Мне нравятся, что цифровые технологии можно применять для проведения семинаров и практических занятий онлайн.                                   |   |   |   |   |   |
| 12                                                                                                                         | Я позитивно отношусь к возможности получать дистанционные консультации у преподавателей и научных руководителей.                                |   |   |   |   |   |
| 13                                                                                                                         | Меня радует возможность посещать онлайн лекции по учебным дисциплинам моего направления обучения.                                               |   |   |   |   |   |
| 14                                                                                                                         | Я получаю удовольствие от знакомства с возможностями новых цифровых образовательных технологий.                                                 |   |   |   |   |   |
| 15                                                                                                                         | Я рад, что теперь есть возможность проходить онлайн-курсы по интересующим меня направлениям на образовательных платформах и в других вузах.     |   |   |   |   |   |
| <i>Пожалуйста, оцените свои представления и знания относительно возможностей цифровых технологий в высшем образовании.</i> |                                                                                                                                                 |   |   |   |   |   |
| 16                                                                                                                         | Я знаком с принципами использования цифровых устройств и технологий на семинарских занятиях в учебных целях.                                    |   |   |   |   |   |
| 17                                                                                                                         | Я плохо разбираюсь в возможностях электронно-библиотечных систем (ЭБС) и баз данных для поиска учебной и научной литературы.                    |   |   |   |   |   |

- 18 Я в курсе какую информацию и возможности предоставляет официальный сайт моего вуза.
- 19 Я знаю, как можно получить учебники и другую литературу в цифровом виде в электронной библиотеке моего вуза.
- 20 Я плохо знаком с правилами сдачи домашних заданий в электронной форме.
- 21 Я в курсе расписания дистанционных консультаций с преподавателями и научными руководителями.
- 22 Я имею представление об особенностях новых цифровых образовательных технологий.
- 23 Я знаю основные возможности и ограничения применения современных цифровых устройств и технологий в учебном процессе.
- 24 Я понимаю, что использование цифровых устройств и технологий при проведении аттестаций и экзаменов имеет свои достоинства и недостатки.
- 25 Я осознаю преимущества и недостатки обсуждения различных учебных вопросов и проблем в социальных сетях и мессенджерах.
- 26 Я хорошо знаю, как использовать социальные сети для того, чтобы узнавать новости студенческой жизни.
- 27 Я не знаком с основными правилами и принципами создания и использования мультимедийных презентаций в учебном процессе.
- 28 Я имею представление о преимуществах и недостатках применения цифровых технологий для проведения семинаров и практических занятий онлайн.
- 29 Я хорошо представляю себе плюсы и минусы онлайн-лекций по учебным дисциплинам моего направления обучения.
- 30 Я не знаком с возможностями обучения на онлайн-курсах по интересующим меня дисциплинам на образовательных платформах и в других вузах.
- Пожалуйста, оцените, насколько Вы владеете цифровыми устройствами и технологиями в процессе обучения в вузе.*
- 31 Я постоянно использую социальные сети для того, чтобы узнавать новости студенческой жизни.
- 32 Я имею большой опыт создания и использования мультимедийных презентаций в учебном процессе.
- 33 Я часто сталкиваюсь с трудностями на семинарах и практических занятиях, проводимых в онлайн формате.
- 34 Мне трудно усваивать материал на онлайн-лекциях по учебным дисциплинам моего направления обучения.
- 35 Я уже прошел или готов в ближайшее время пройти онлайн-курс по интересующему меня направлению на внешних образовательных платформах или в других вузах.
- 36 Я постоянно пользуюсь цифровыми устройствами и технологиями в процессе обучения в вузе.
- 37 Я имею опыт прохождения аттестаций и сдачи экзаменов в вузе с использованием цифровых устройств и технологий.
- 38 Я часто обсуждаю учебные вопросы и проблемы в социальных сетях и мессенджерах.
- 39 Я редко пользуюсь электронной библиотекой моего вуза для получения учебников и другой литературы в цифровом виде.
- 40 Я предпочитаю сдавать домашние задания в электронной форме, а не в «бумажной» форме.
- 41 Я часто консультируюсь с преподавателями и научным руководителем посредством цифровых технологий.

- 42 Я постоянно осваиваю и применяю новые цифровые образовательные технологии.
- 43 Я часто использую цифровые устройства и технологии на семинарских занятиях в учебных целях.
- 44 Я постоянно пользуюсь электронно-библиотечными системами (ЭБС) и базами данных для поиска учебной и научной литературы.
- 45 Я очень редко пользуюсь официальным сайтом моего вуза.

- 1 - Совершенно не согласен
- 2 - Скорее не согласен
- 3 - Нечто среднее
- 4 - Скорее согласен
- 5 - Полностью согласен

| Шкалы опросника         | Пункты опросника                                                                                                                                                                    |
|-------------------------|-------------------------------------------------------------------------------------------------------------------------------------------------------------------------------------|
| Эмоциональный компонент | 1; 2г; 3; 4; 5; 6; 7; 8; 9г; 10; 11; 12; 13; 14; 15                                                                                                                                 |
| Когнитивный компонент   | 16; 17г; 18; 19; 20г; 21; 22; 23; 24; 25; 26; 27г; 28; 29; 30г                                                                                                                      |
| Поведенческий компонент | 31; 32; 33г; 34г; 35; 36; 37; 38; 39г; 40; 41; 42; 43; 44; 45г                                                                                                                      |
| Сумма                   | 1; 2г; 3; 4; 5; 6; 7; 8; 9г; 10; 11; 12; 13; 14; 15; 16; 17г; 18; 19; 20г; 21; 22; 23; 24; 25; 26; 27г; 28; 29; 30г; 31; 32; 33г; 34г; 35; 36; 37; 38; 39г; 40; 41; 42; 43; 44; 45г |

*Примечание:* г – пункты, требующие перекодирования: балл 1 меняется на 5, 2 – на 4, 3 не меняется, 4 – на 2, 5 – на 1.

#### Дополнительные вопросы

*Пожалуйста, выскажите свое мнение по некоторым проблемам, связанным с использованием цифровых образовательных технологий.*

46. Выберите утверждение, с которым Вы согласны:

- Дистанционные образовательные технологии имеют больше преимуществ перед стационарным обучением
- Дистанционные образовательные технологии имеют больше недостатков чем стационарное обучение
- Дистанционные образовательные технологии и стационарное обучение в равной степени эффективны
- Затрудняюсь ответить

47. Каким образом, по Вашему мнению, цифровые технологии влияют на процесс обучения?

- Положительно
- Отрицательно
- Не влияют
- Затрудняюсь ответить

48. Как Вы оцениваете свой опыт электронного обучения, полученный в период пандемии?

- Положительно
- Отрицательно
- Нечто среднее
- Затрудняюсь ответить

49. Изменилось ли Ваше отношение к использованию цифровых технологий в образовании с переходом на онлайн-обучение?

- Да, в лучшую сторону

- Нет, не изменилось
- Да, в худшую сторону
- Затрудняюсь ответить

50. В чем заключаются основные «плюсы» использования цифровых технологий в высшем образовании по Вашему мнению? (Можно выбрать несколько вариантов и/или вписать свой ответ).

- Удобство и комфорт
- Экономия времени
- Скорость поиска и объем информации
- Доступность учебных материалов
- Возможности для саморазвития
- Другое \_\_\_\_\_

51. В чем заключаются основные «минусы» использования цифровых технологий в высшем образовании по Вашему мнению? (Можно выбрать несколько вариантов и/или вписать свой ответ).

- Технические неполадки
- Проблемы с самодисциплиной и вниманием
- Отсутствие «живого» общения
- Трудности в контактах с преподавателями
- Вред для здоровья
- Другое \_\_\_\_\_

52. Представьте себе ситуацию: в научной социальной сети Вам написал оскорбительный комментарий незнакомый Вам человек. Как Вы, скорее всего, поступите в этом случае?

- Отвечу ему тем же
- Удалю свой аккаунт
- Проигнорирую
- Затрудняюсь ответить

53. Представьте себе ситуацию: Вам пришло письмо от администрации сервиса корпоративной почты Вашего вуза о том, что Ваш ящик взломан. Чтобы его восстановить, Вас просят прислать пароль. Как Вы, скорее всего, поступите в этом случае?

- Отвечу на письмо и вышлю пароль
- Выйду из почты и зайду еще раз
- Удалю это письмо и поменяю пароль
- Затрудняюсь ответить

54. Представьте себе ситуацию: Вам пришло сообщение о том, что вы выиграли грант на обучение в престижном университете за рубежом. Для получения гранта Вас просят немедленно оплатить билеты. Для этого нужно прислать данные банковской карты. Что Вы, скорее всего, сделаете в этом случае?

- Отправлю данные карты, но не буду высылать пин-код
- Отправлю все данные и пин-код
- Удалю сообщение как спам
- Напишу в компанию, от которой пришло письмо

55. Представьте себе ситуацию: Вы сходили на лекцию известного профессора, записали ее на видео и выложили на YouTube, а это видео временно заблокировали. Как Вы думаете, почему это случилось и что Вы, скорее всего, будете делать в этом случае?

- Это технический сбой, зарегистрируюсь как новый пользователь и выложу видео еще раз
- Это технический сбой, напишу в администрацию с требованием разблокировать видео
- Это нарушение авторских прав, удалю это видео
- Затрудняюсь ответить
